# Supplementary material
Source: PubMed Central journal article supplement (PMC3432238)
Supplement: supp_bhr315_BHR315_SuppFig2.pdf [file supp_bhr315_BHR315_SuppFig2.pdf]

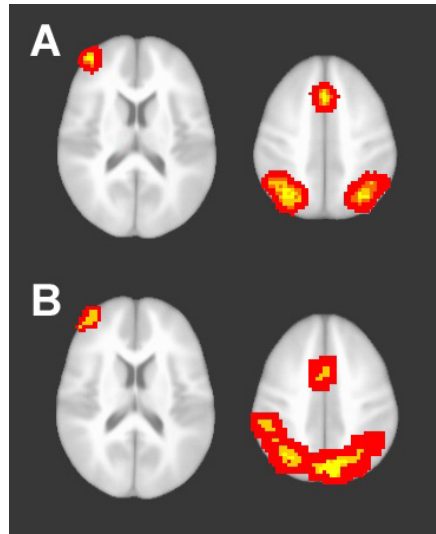

**Supplementary Figure 2.**

Regions showing significantly greater activity for old squiggles given remember responses versus correctly rejected new squiggles, shown separately for meaningful squiggles (**A**) and meaningless squiggles (**B**). Regions overlapped considerably with those identified in relation to recognition confidence (Figure 4CD). For meaningful squiggles, regions included bilateral superior parietal cortex (volume = 26,082 mm<sup>3</sup>, left centroid coordinates = -31, -64, +40, right centroid coordinates = +32, -63, +36), bilateral medial frontal gyrus (volume = 8,937 mm<sup>3</sup>, centroid coordinates = -0, +19, +44), and left superior frontal gyrus (volume = 6,858 mm<sup>3</sup>, centroid coordinates = -35, +54, +15). For meaningless squiggles, regions included bilateral superior parietal cortex (volume = 31,077 mm<sup>3</sup>, left centroid coordinates = -30, -67, +40, right centroid coordinates = +15, -74, +46), bilateral medial frontal gyrus (volume = 15,552 mm<sup>3</sup>, centroid coordinates = -2, +6, +42), and left superior frontal gyrus (volume = 13,743 mm<sup>3</sup>, centroid coordinates = -38, +53, +16).
