# Supplementary material
Source: PubMed Central journal article supplement (PMC3432238)
Supplement: supp_bhr315_BHR315_SuppFig3.pdf [file supp_bhr315_BHR315_SuppFig3.pdf]

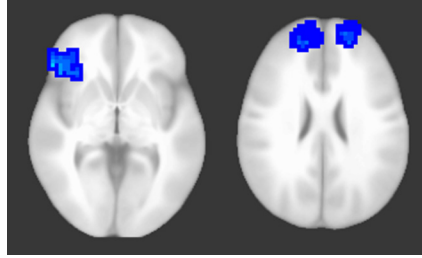

**Supplementary Figure 3.** Regions showing significantly less activity for false alarms than for correct rejections for meaningful squiggles during the recognition test. On the left is the inferior frontal region that overlapped substantially with the ROI in Figure 3C (MNI coordinates of the centroid = -49, +33, +1; volume = 6,831mm<sup>3</sup>; Brodmann's area 47). On the right are left and right superior frontal regions (respectively, MNI coordinates of the centroid = -4, +20, +69 and +20, +66, +25; volume = 8,127mm<sup>3</sup> and 7,749 mm<sup>3</sup>; Brodmann's areas 6 and 10).
